# Supplementary material
Source: PubMed Central journal article supplement (PMC1636623)
Supplement: 7601413s1.pdf [file 7601413s1.pdf]

# Supplementary Figure S1

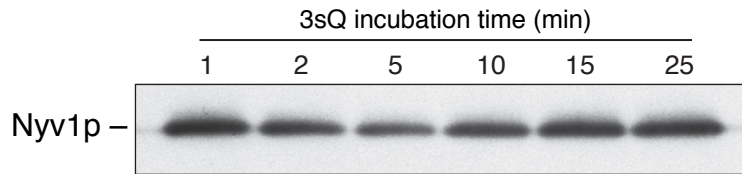

## Supplementary Figure S1. Kinetics of 3sQ binding to Nyv1p on the vacuole.

Standard fusion reactions were initiated by incubating at 27°C with 3sQ (2  $\mu$ M; GST-sVti1p, his<sub>6</sub>-sVam3p, Vam7p). A portion of reactions was removed at the indicated times (1, 2, 5, 10, 15, or 25 min) and immediately subjected to centrifugation (13,800g, 3 min, 4°C) to remove any unbound 3sQ. Sedimented vacuoles were resuspended in ice-cold solubilization buffer (20 mM HEPES/KOH, pH 7.4, 100 mM NaCl, 2 mM EDTA, 0.5% Triton X-100, 20% glycerol, 1x protease inhibitor cocktail (0.46  $\mu$ g/ml leupeptin, 3.5  $\mu$ g/ml pepstatin, 2.4  $\mu$ g/ml pefabloc-SC, 1 mM PMSF) and incubated at 4°C with rocking for 20 min. Detergent insoluble material was removed by centrifugation (TLA120.2, 52,000 r.p.m., 20 min, 4°C). Clarified detergent extracts were incubated on a nutator for 3 hrs at 4°C with Glutathione Sepharose beads (Amersham). Beads were collected by brief centrifugation (3,000g, 2 min, 4°C) and washed 5 times with ice-cold solubilization buffer. Under this condition, almost all of the Nyv1p was cleared from the detergent extracts (data not shown). Bound proteins were eluted in reducing SDS sample buffer (95°C, 3 min) for SDS-PAGE followed by immunoblotting.
