# Supplementary material
Source: PubMed Central journal article supplement (PMC1636623)
Supplement: 7601413s2.pdf [file 7601413s2.pdf]

## Supplementary Figure S2

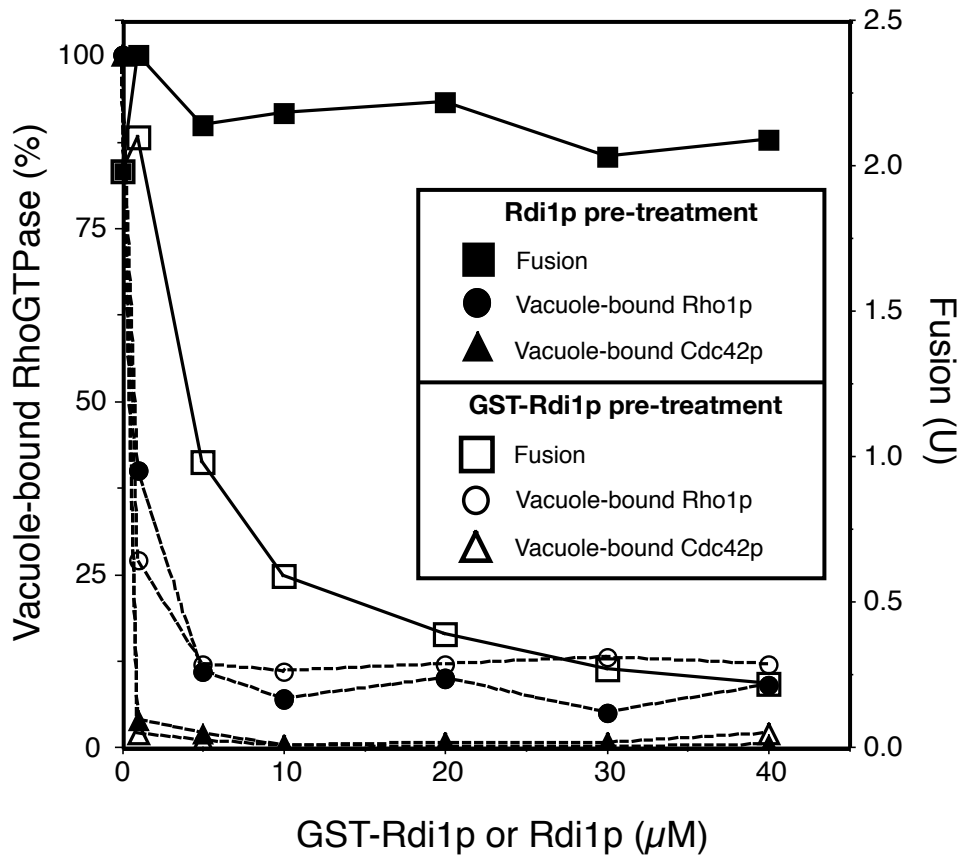

### Supplementary Figure S2. GST-Rdi1p does not inhibit fusion via RhoGTPase extraction.

Two sets of standard 30  $\mu\text{l}$  vacuole fusion reactions lacking ATP were incubated on ice with GST-Rdi1p (open symbols) or untagged Rdi1p (closed symbols) for 25 min., then diluted with 60  $\mu\text{l}$  buffer (20 mM PIPES.KOH, pH 6.8, 200 mM sorbitol, 125 mM KCl, 5 mM  $\text{MgCl}_2$ ) and reisolated via centrifugation (8,000g, 4 min, 4  $^\circ\text{C}$ ). Supernatants were aspirated. For fusion analysis, one set of vacuole pellets was gently resuspended in this buffer, and coenzyme A, IB2, and ATP were added to standard final concentrations (30  $\mu\text{l}$  final volume; see Materials and Methods). Fusion reactions were incubated at 27  $^\circ\text{C}$  for 90 min and assayed for Pho8p activity (squares, solid lines). The remaining vacuole pellets were resuspended in 30  $\mu\text{l}$  buffer, and mixed with SDS-loading buffer. Equivalent fractions were resolved by SDS-PAGE and transferred to nitrocellulose. Membranes were probed with antibodies to Pho8p, Rho1p, and Cdc42p. Quantification of vacuole-bound Rho1p (circles) and Cdc42p (triangles) was achieved with ImageQuantNT v5.1 and Personal Densitometer SI scanner (Molecular Devices).
